# Supplementary material for: Monocyte infiltration is an independent positive prognostic biomarker in vulvar squamous cell carcinoma
Source: PubMed Central journal article supplement (PMC11219697; doi:10.1007/s00262-024-03755-w), 2024-07-02
Supplement: 262_2024_3755_MOESM1_ESM.pdf [file 262_2024_3755_MOESM1_ESM.pdf]

A

## Epithelium

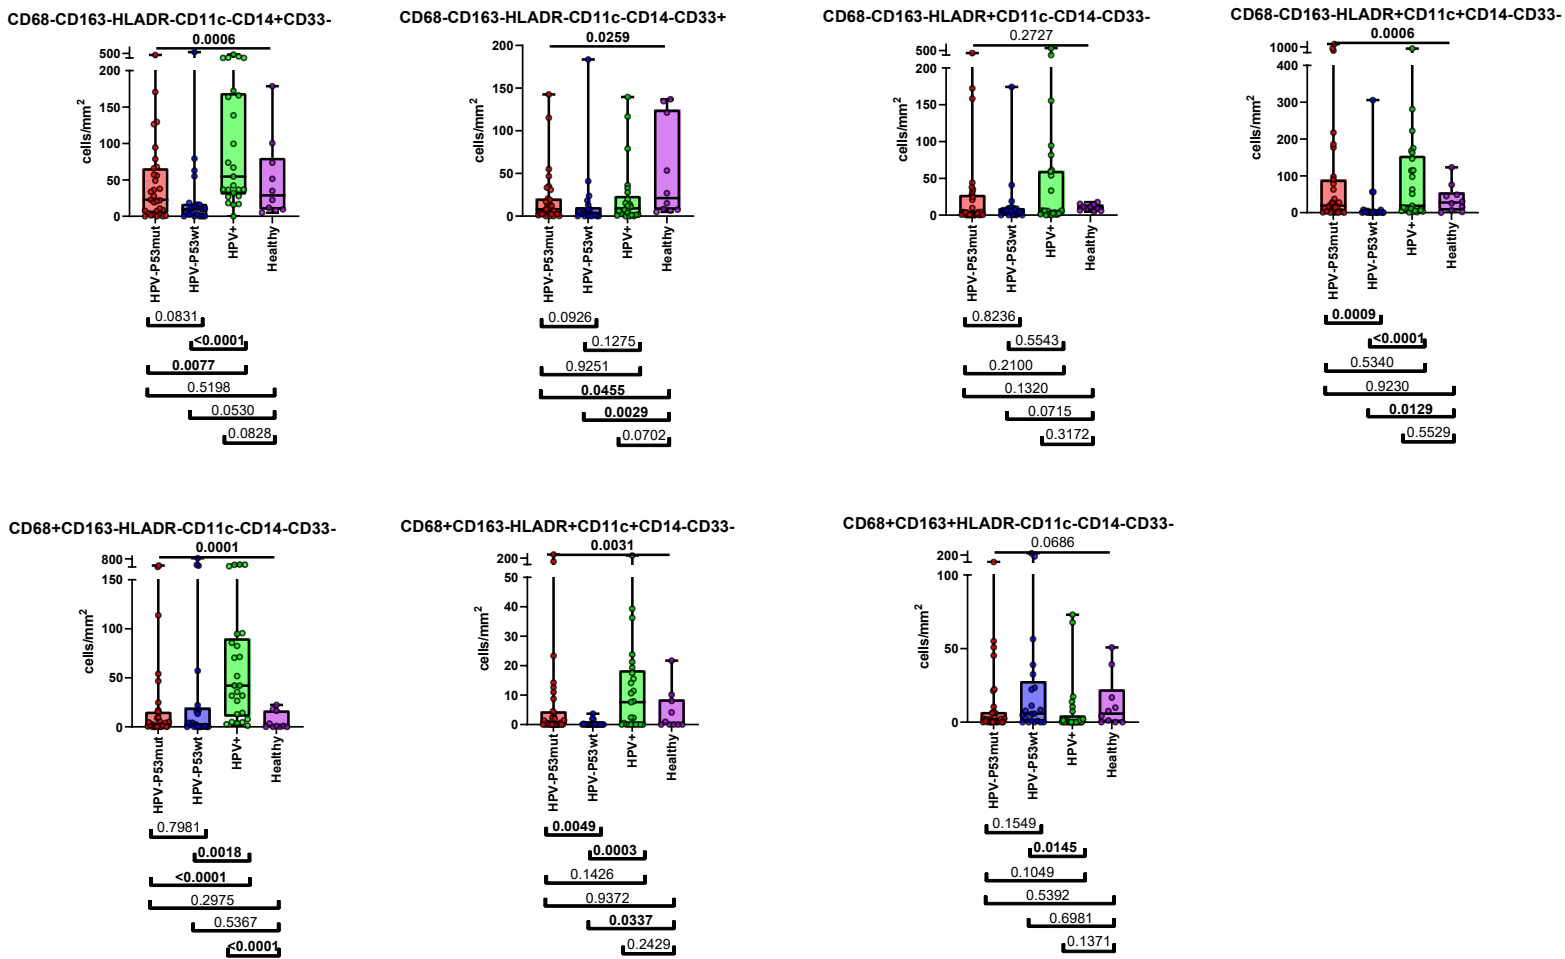

**Supplemental Figure 1. Myeloid infiltrate per VSCC molecular subgroup and in healthy vulva.**

A) Myeloid infiltrate in the epithelium. HPV-P53mut VSCC n=31, HPV-P53wt VSCC n=21, HPV+ VSCC n=25, healthy HPV- vulva n=10. Boxplots with middle line indicating median, colored box indicating interquartile range, vertical lines from minimum to maximum. Kruskal Wallis test derived p-value depicted on top of the boxplots, indicating a significant difference across the four groups. Mann-Whitney U test derived p-values depicted below the boxplots, indicating a significant difference between two groups.

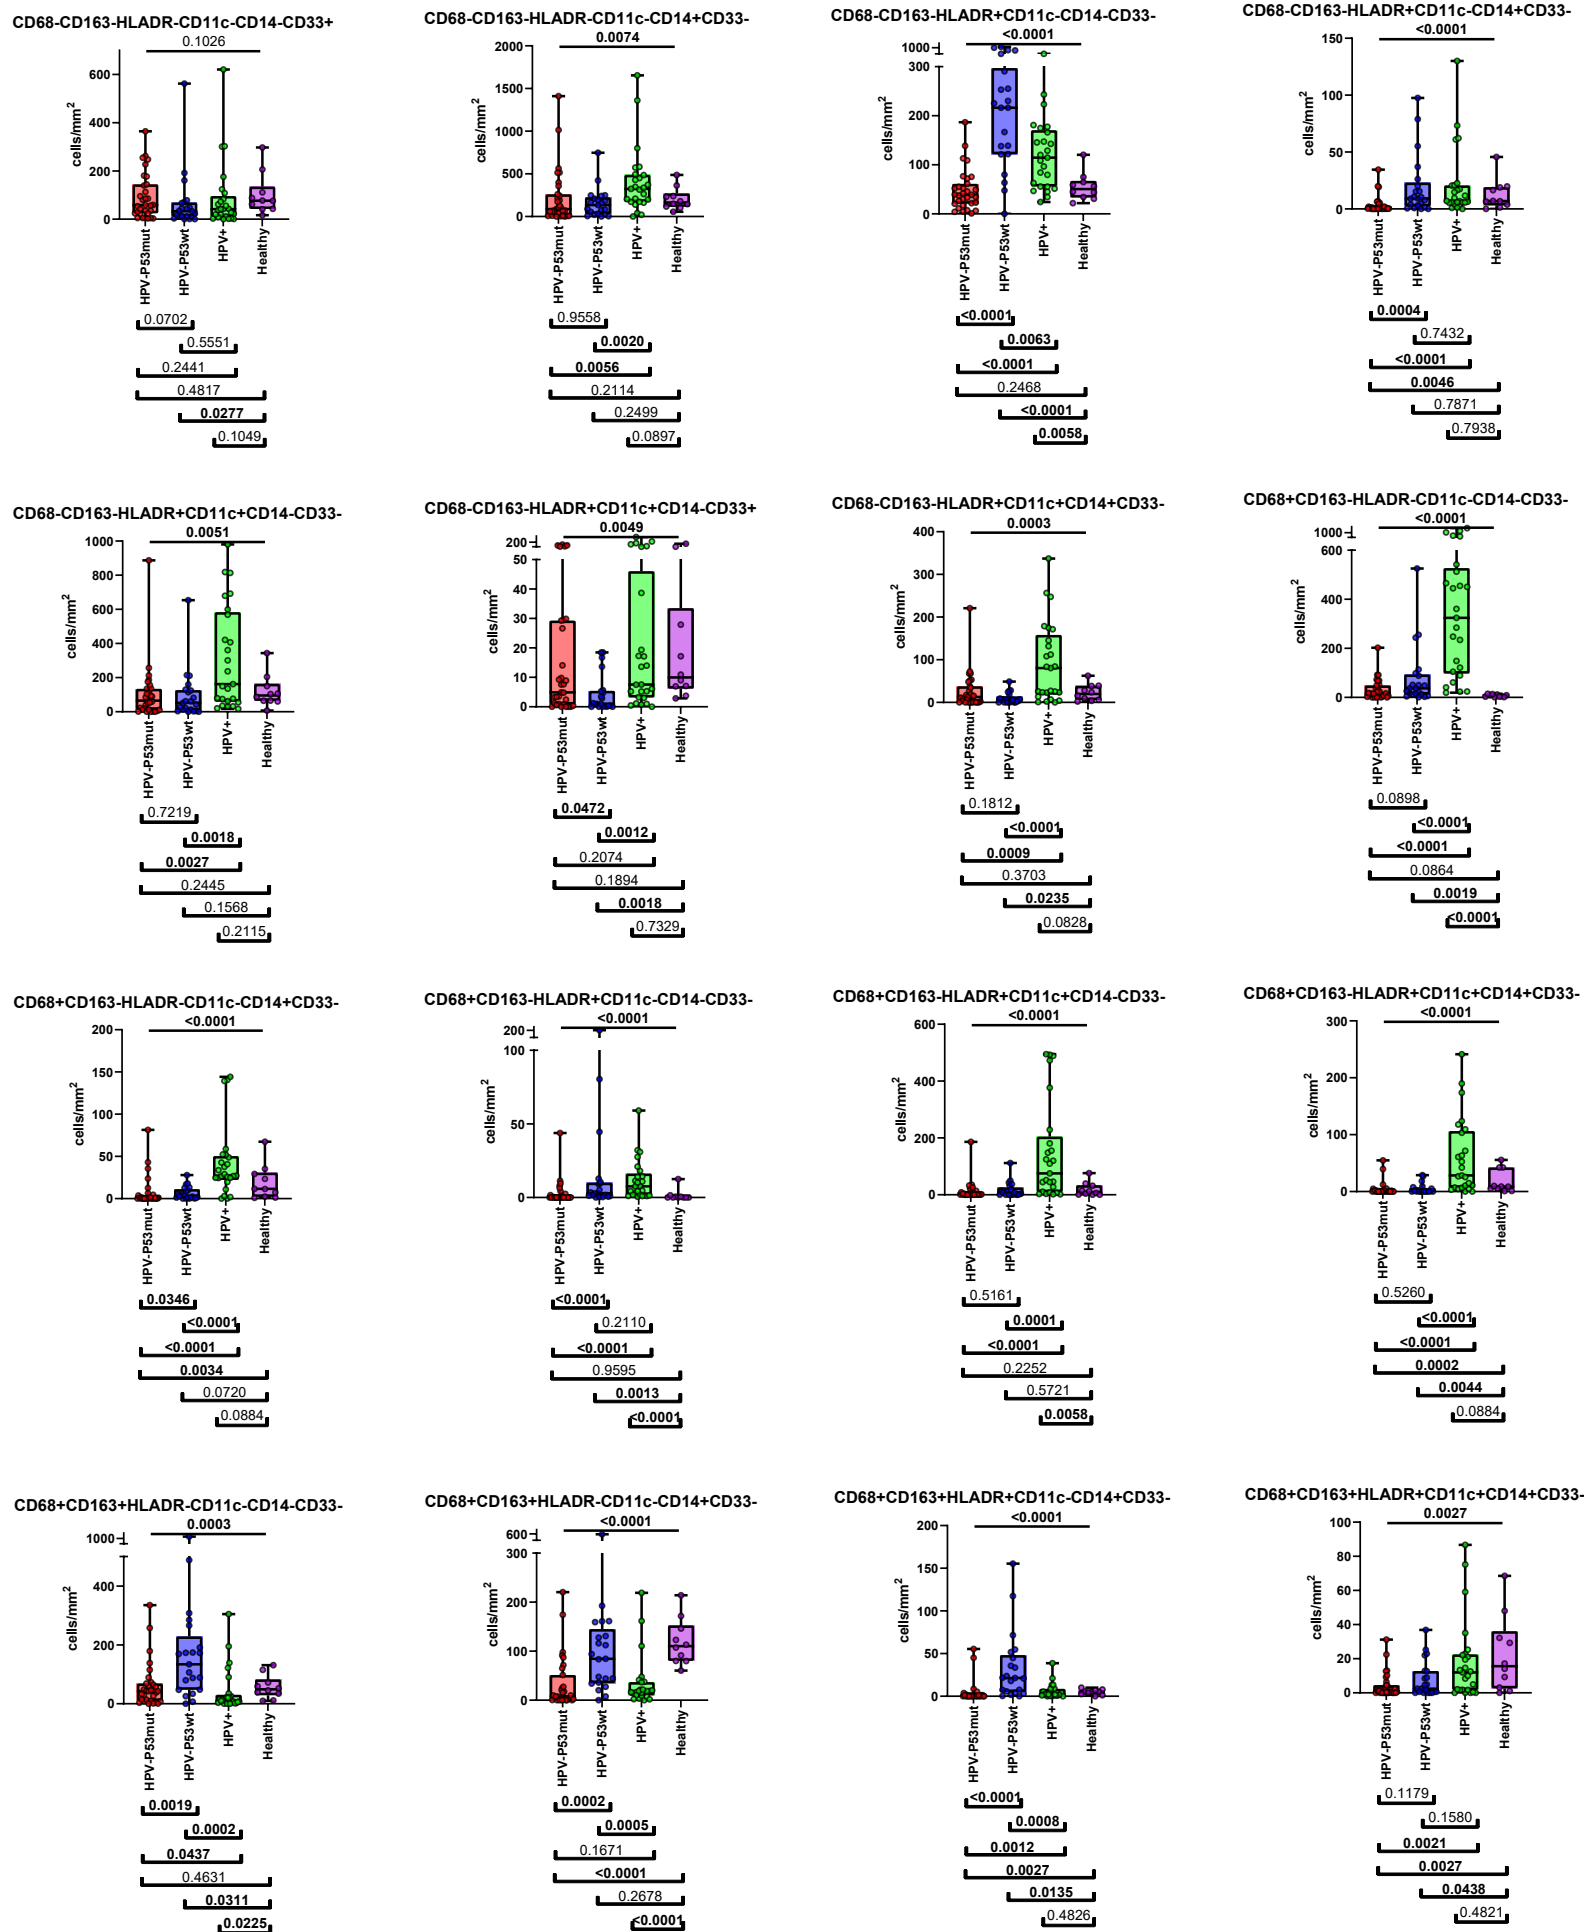

**Supplemental Figure 1. Myeloid infiltrate per VSCC molecular subgroup and in healthy vulva.**

B) Myeloid infiltrate in the stroma. HPV-P53mut VSCC n=31, HPV-P53wt VSCC n=21, HPV+ VSCC n=25, healthy HPV- vulva n=10. Boxplots with middle line indicating median, colored box indicating interquartile range, vertical lines from minimum to maximum. Kruskal Wallis test derived p-value depicted on top of the boxplots, indicating a significant difference across the four groups. Mann-Whitney U test derived p-values depicted below the boxplots, indicating a significant difference between two groups.

## Epithelium

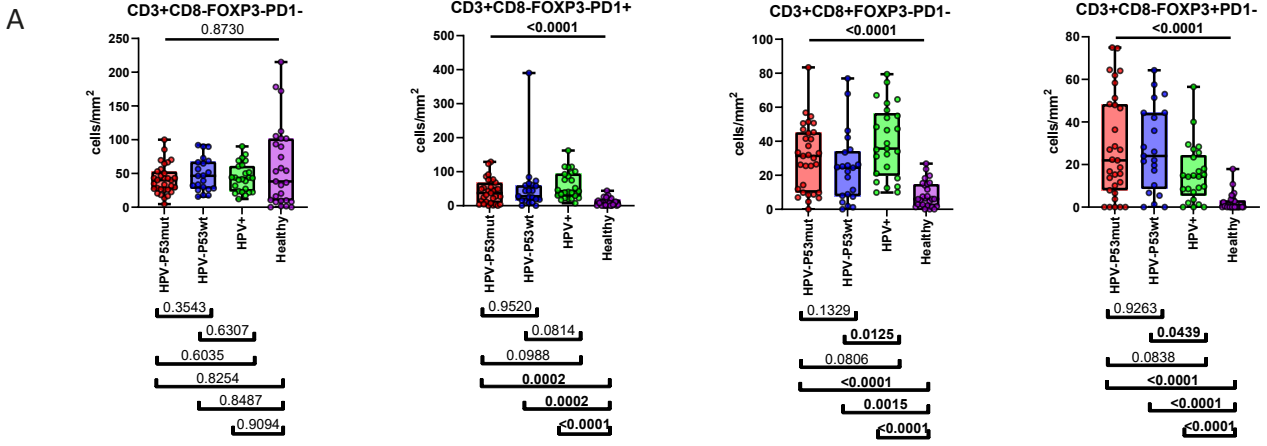

## Stroma

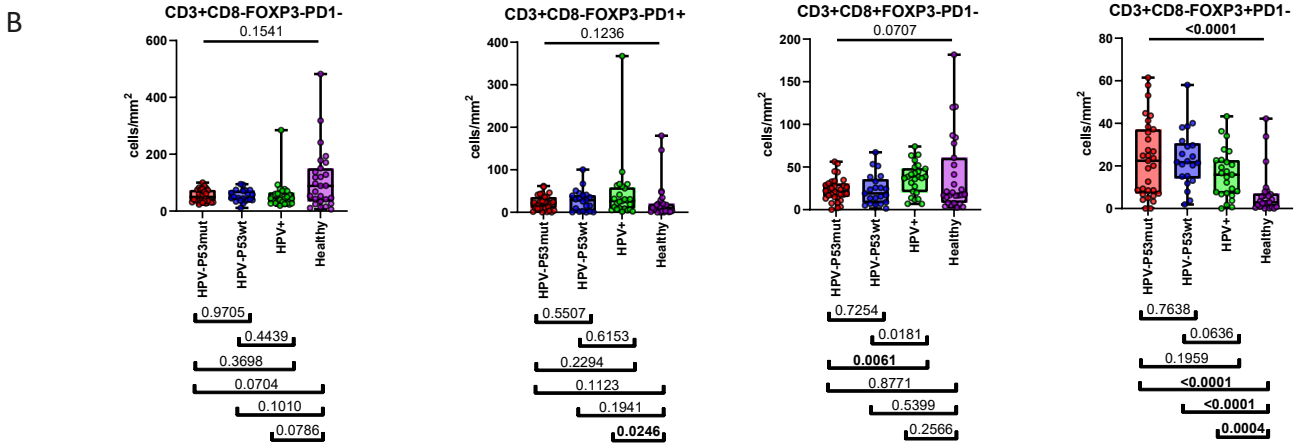

**Supplemental Figure 2. Lymphoid infiltrate per VSCC molecular subgroup and in healthy vulva.**

A) Lymphoid infiltrate in the epithelium. B) lymphoid infiltrate in the stroma.

HPV-P53mut VSCC n=31, HPV-P53wt VSCC n=21, HPV+ VSCC n=25, healthy HPV- vulva n=27.

Boxplots with middle line indicating median, colored box indicating interquartile range, vertical lines from minimum to maximum.

Kruskal Wallis test derived p-value depicted on top of the boxplots, indicating a significant difference across the four groups.

Mann-Whitney U test derived p-values depicted below the boxplots, indicating a significant difference between two groups.

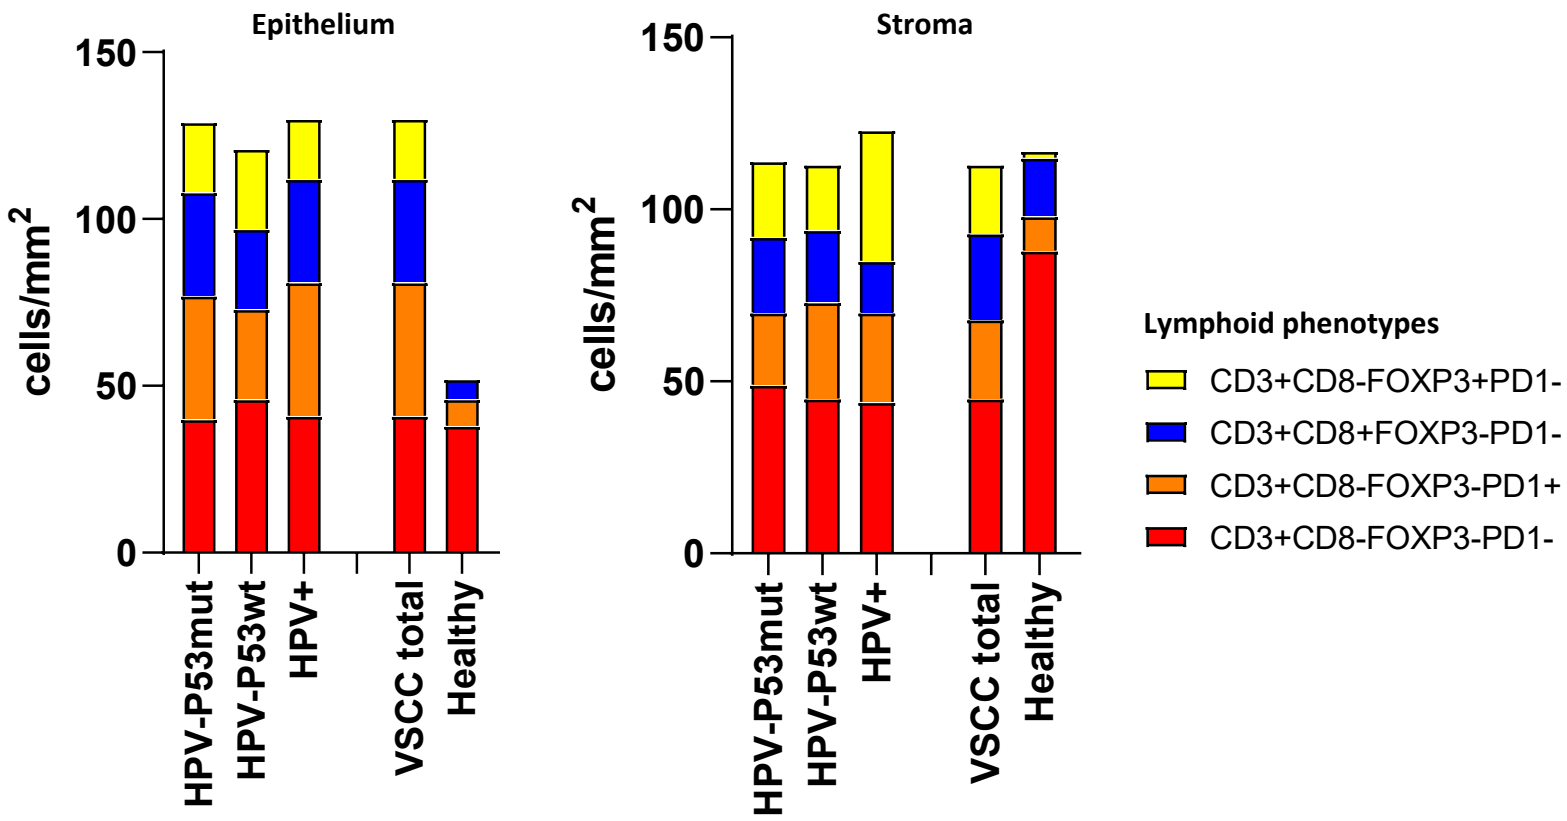

**Supplemental Figure 3. No lymphoid immune composition differences across VSCC molecular subgroups.**  
 HPV-P53mut VSCC n=31, HPV-P53wt VSCC n=21, HPV+ VSCC n=25, healthy HPV- vulva n=10.

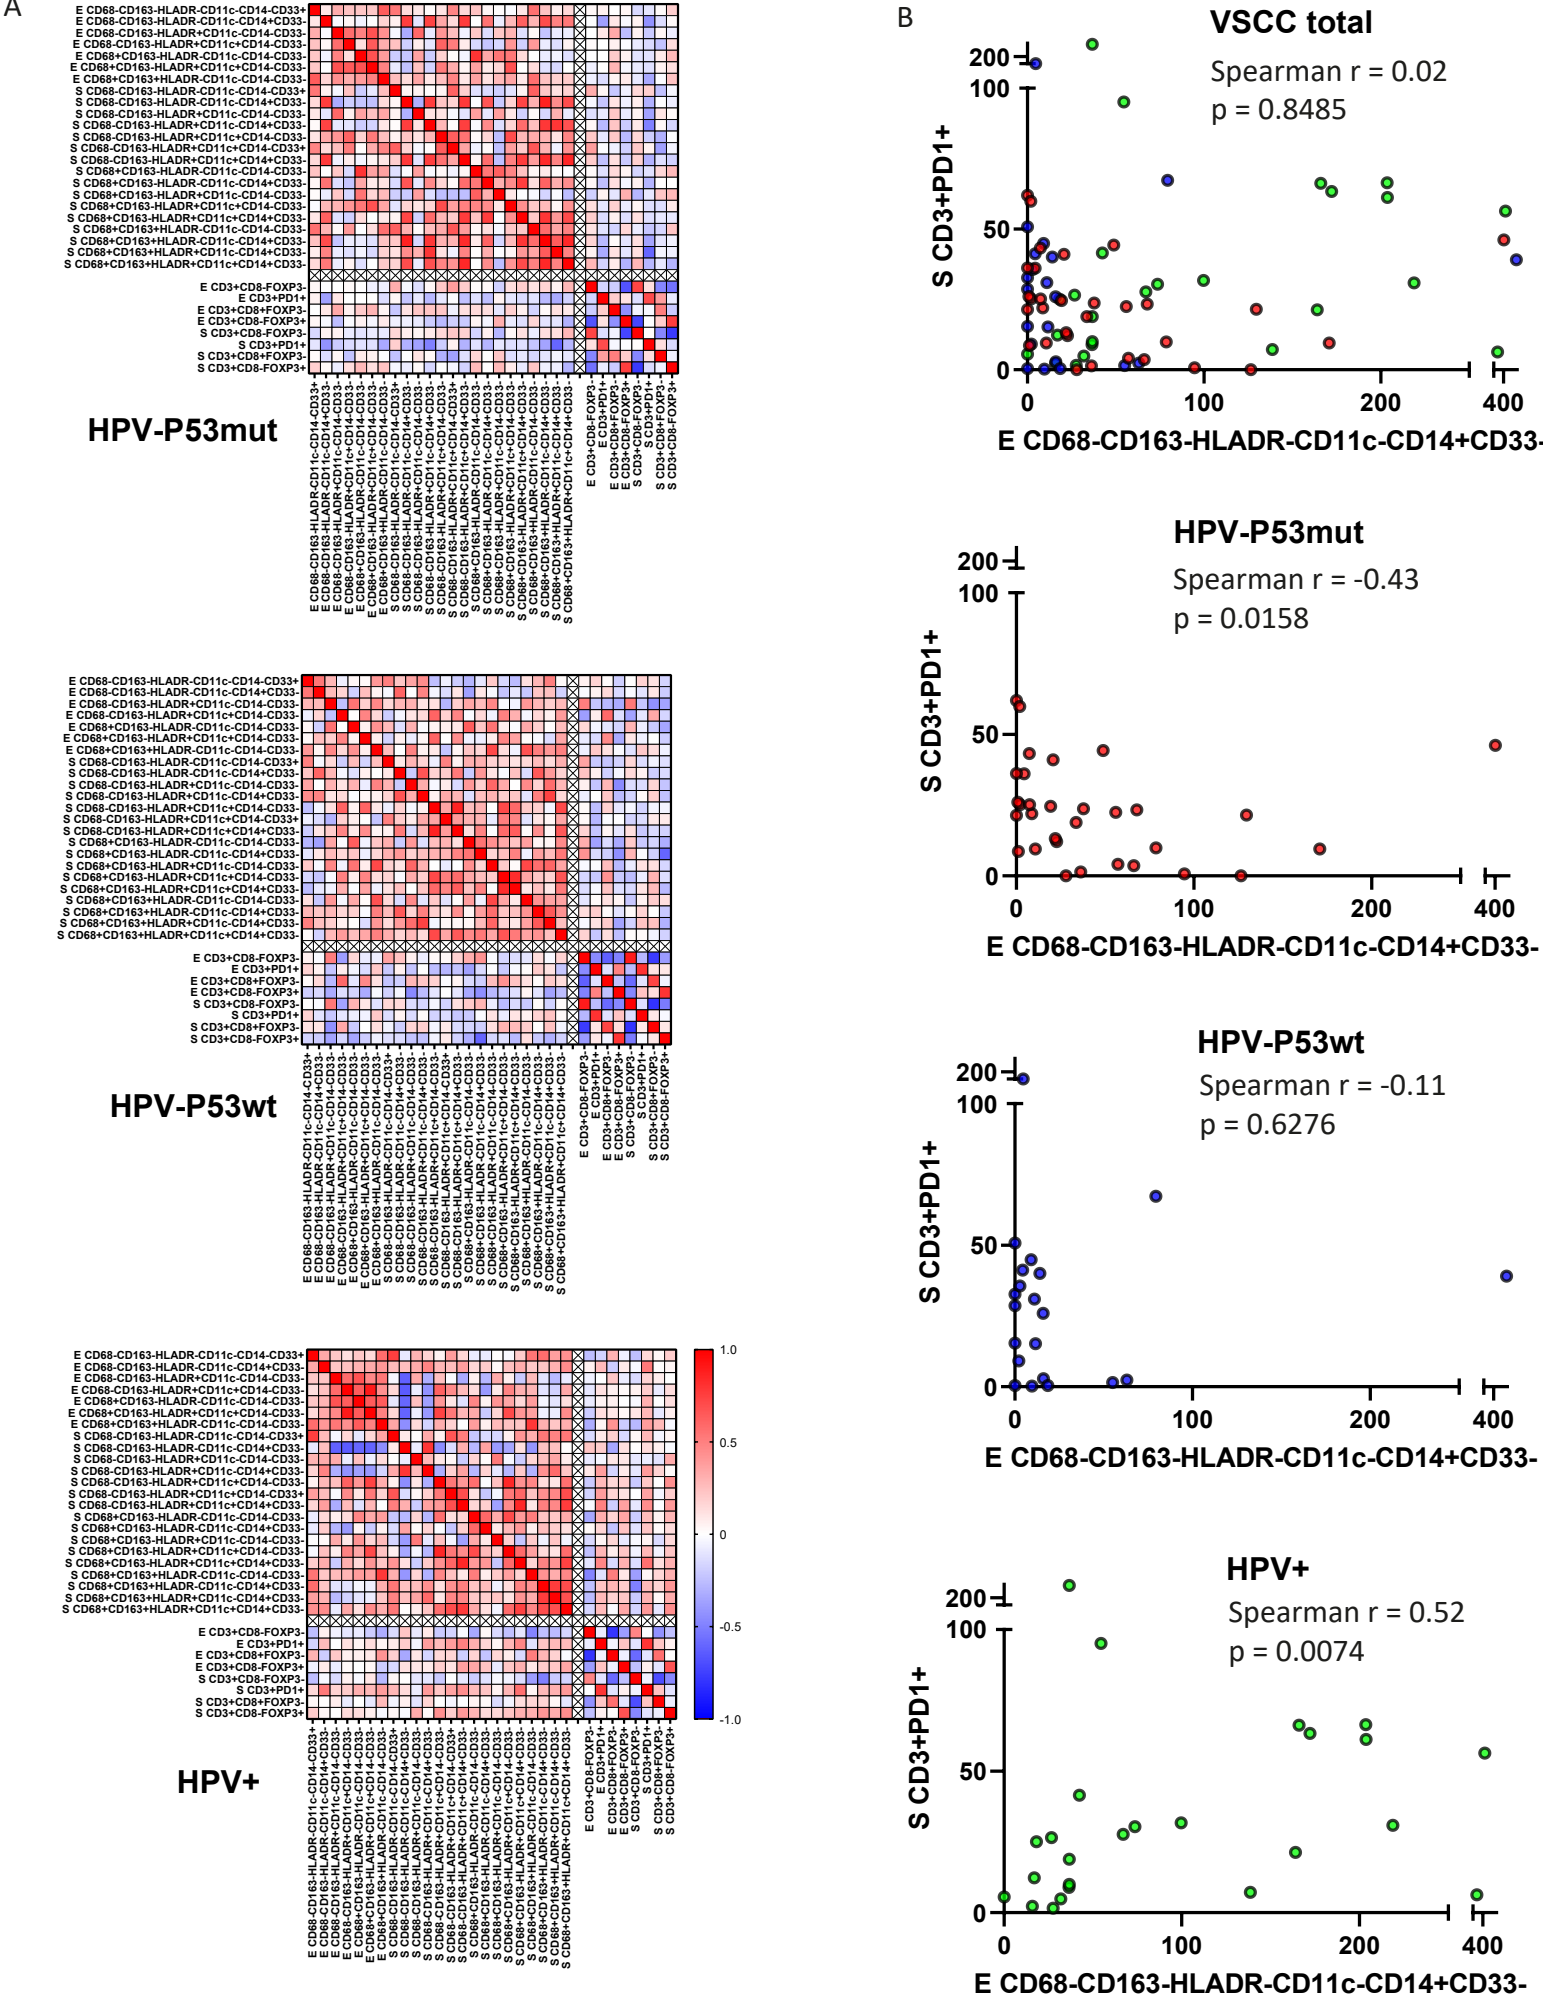

**Supplemental Figure 4. Correlation of myeloid and lymphoid immune infiltrate per VSCC molecular subgroup.**  
 A) Spearman correlation heatmap between myeloid and lymphoid immune phenotypes, per VSCC molecular subgroup. HPV-P53mut VSCC n=31, HPV-P53wt VSCC n=21, HPV+ VSCC n=25. B) Correlation dot plots between stromal CD3+PD1+ T cells and epithelial CD68-HLADR-CD11c-CD14+CD33- monocytes. Visualized for the total VSCC cohort n=77, and per molecular subgroup separately: HPV-P53mut VSCC (red) n=31, HPV-P53wt VSCC (blue) n=21, HPV+ VSCC (green) n=25.

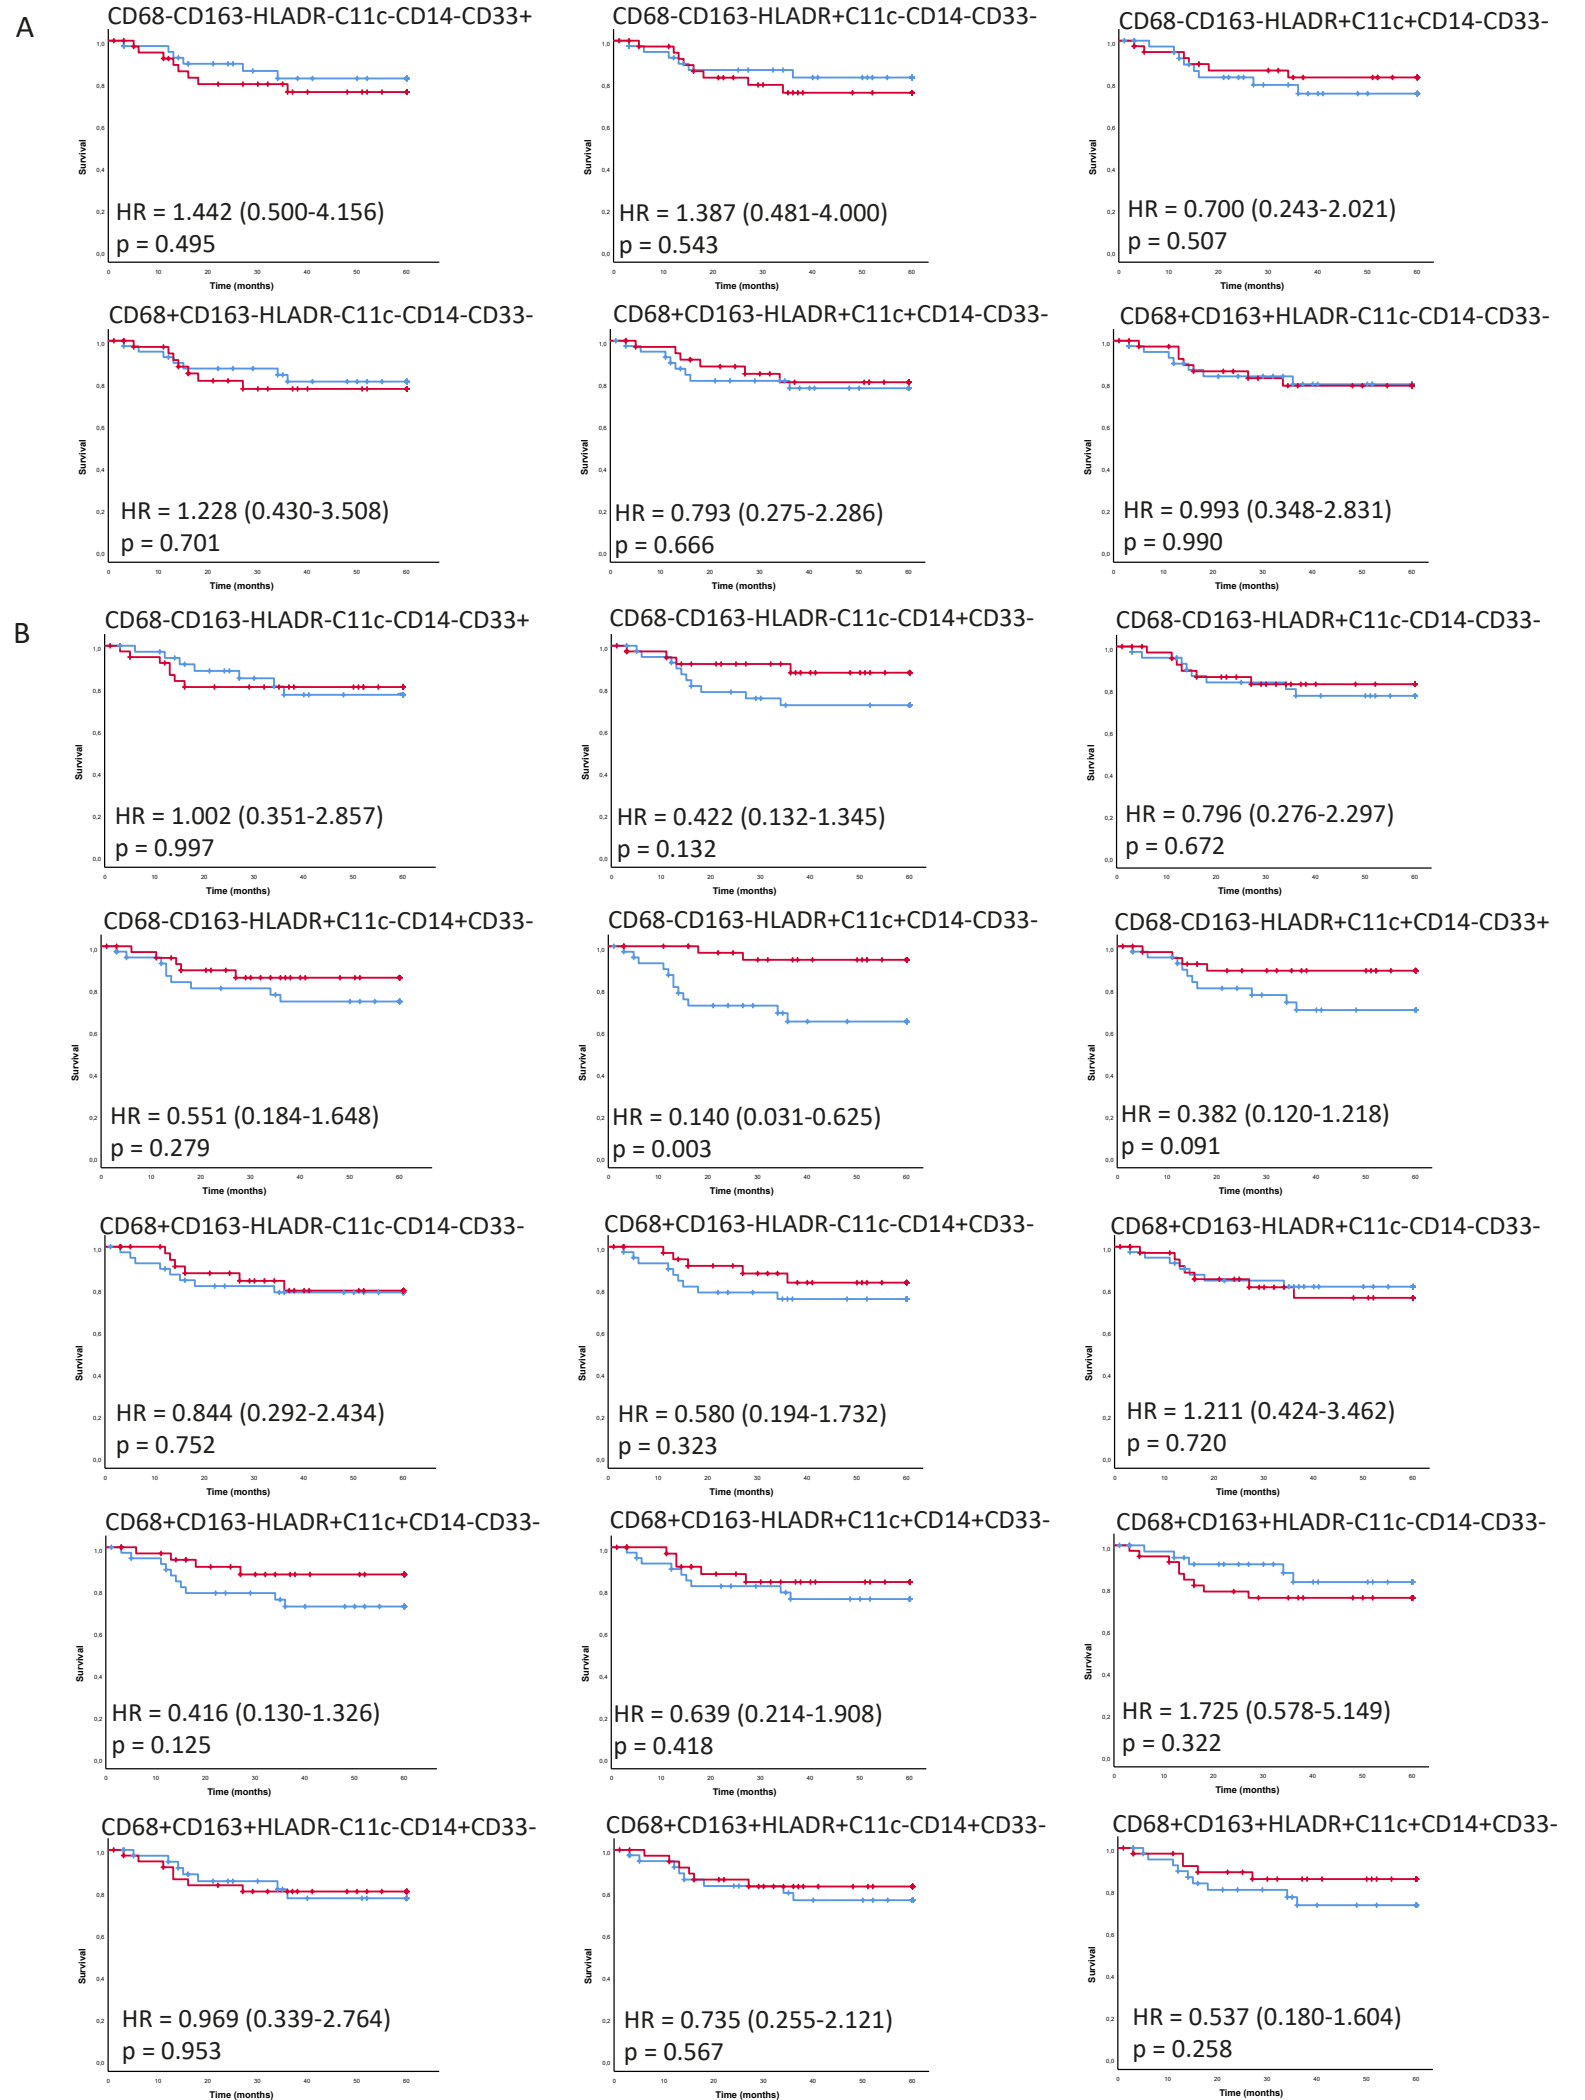

**Supplemental Figure 5. Impact of myeloid cell phenotypes presence on survival of VSCC patients.**

The median counts of each myeloid cell phenotype were used to split the total VSCC cohort (n=77) into high (red) or low (blue) infiltrated. The respective Kaplan Meier curves are depicted in A) for the epithelial phenotypes and in B) for the stromal phenotypes, including the hazard ratio (HR, between brackets the 95% confidence interval of the hazard ratio is provided) and p-value.

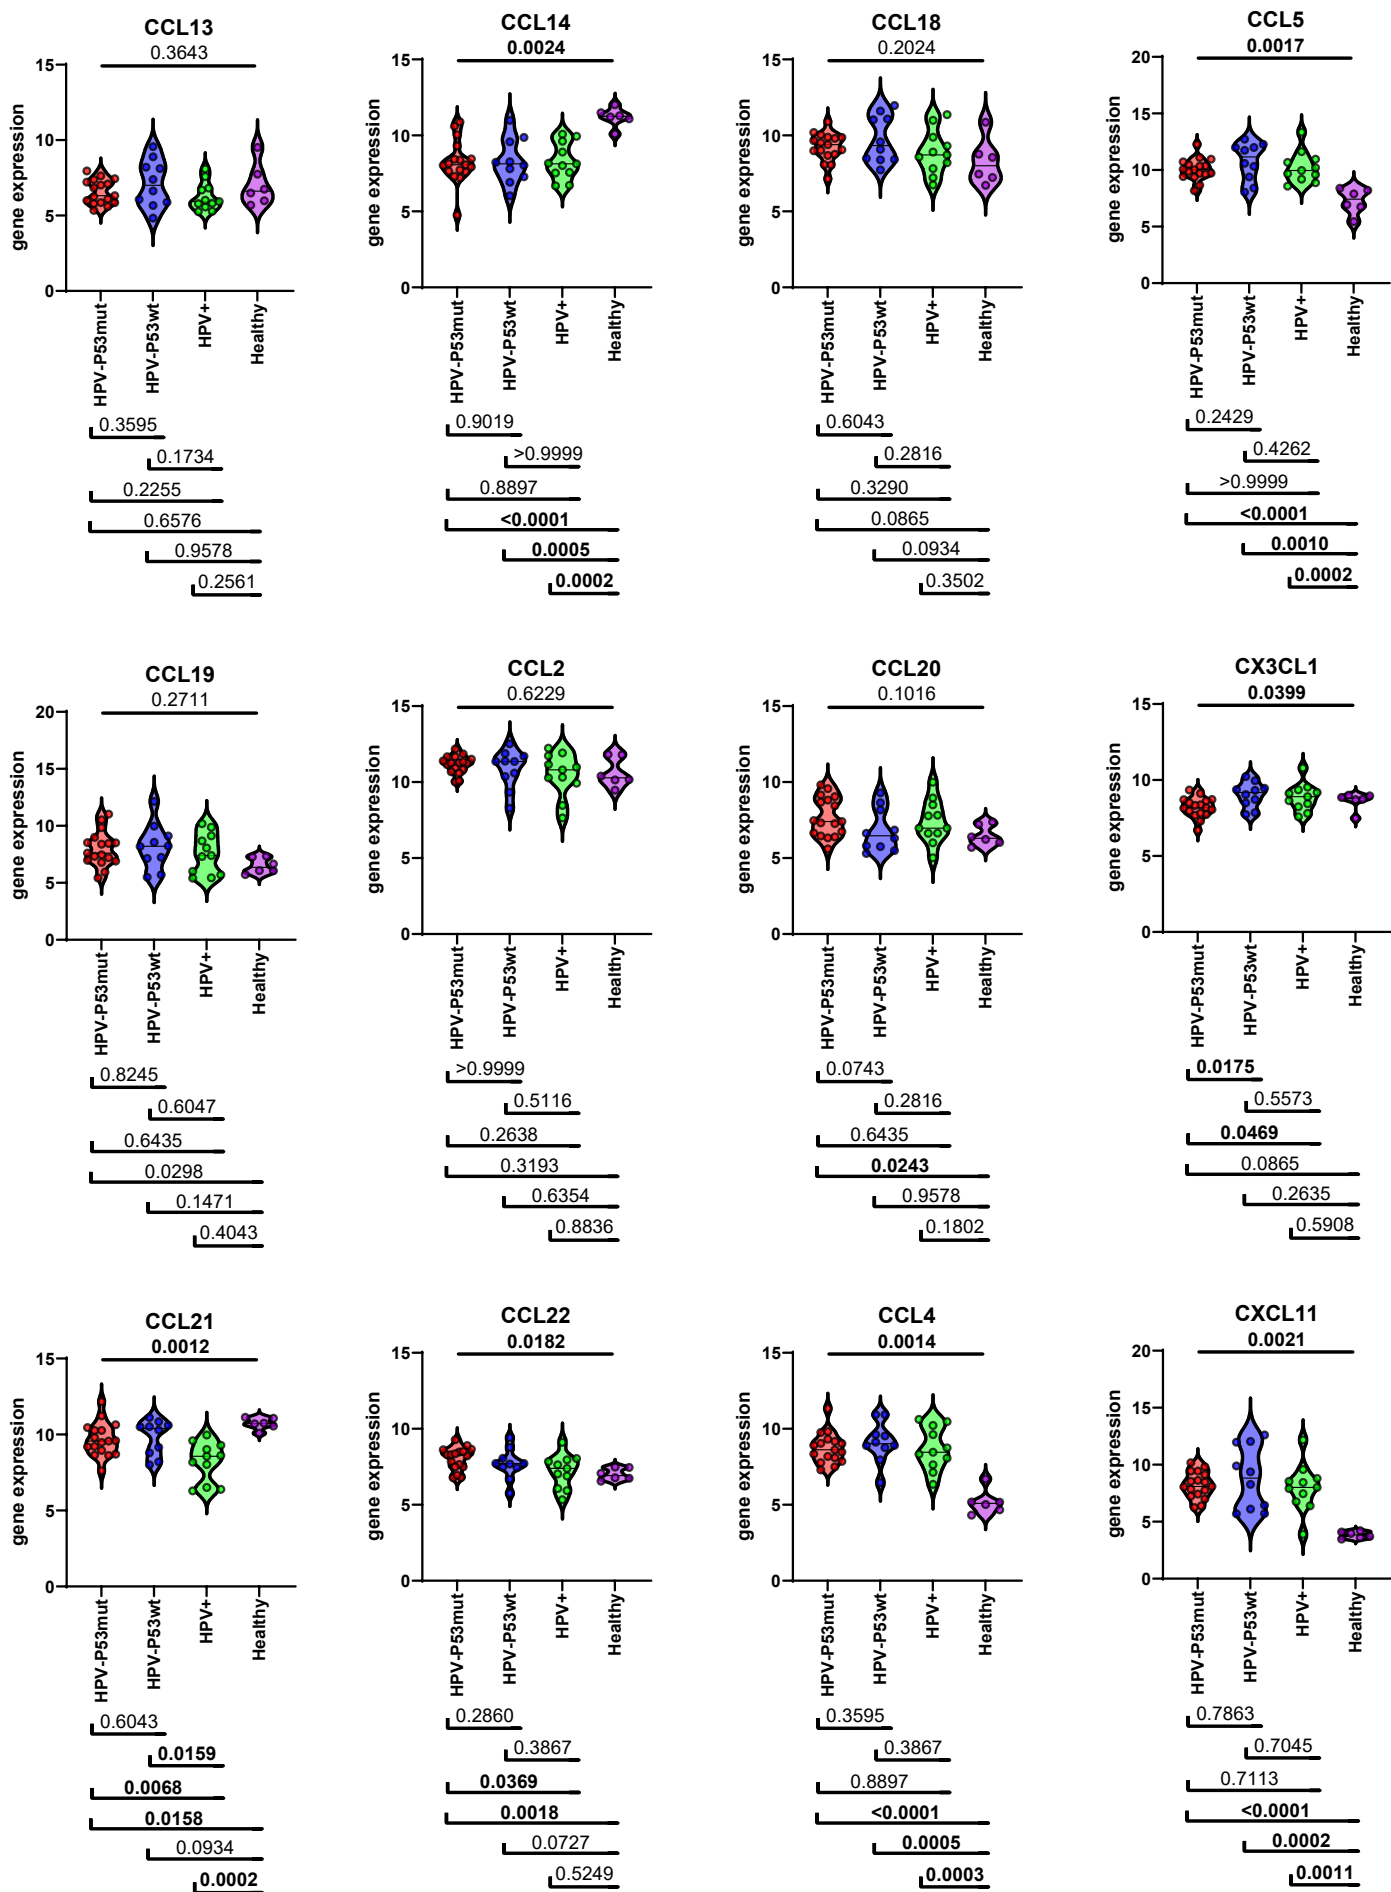

**Supplemental Figure 6. Cytokine gene expression in VSCC, split per molecular subgroup, and in healthy vulva.**

Violin plots for the expression of all cytokines by VSCC (total n=44) and in healthy HPV- vulva (n=6),

VSCC split per molecular subgroup: HPV-P53mut n=17, HPV-P53wt n=10, HPV+ n=11.

Kruskal Wallis test derived p-value depicted on top of violin plots, indicating a significant difference across the four groups.

Mann-Whitney U test derived p-values depicted below the violin plots, indicating a significant difference between two groups.

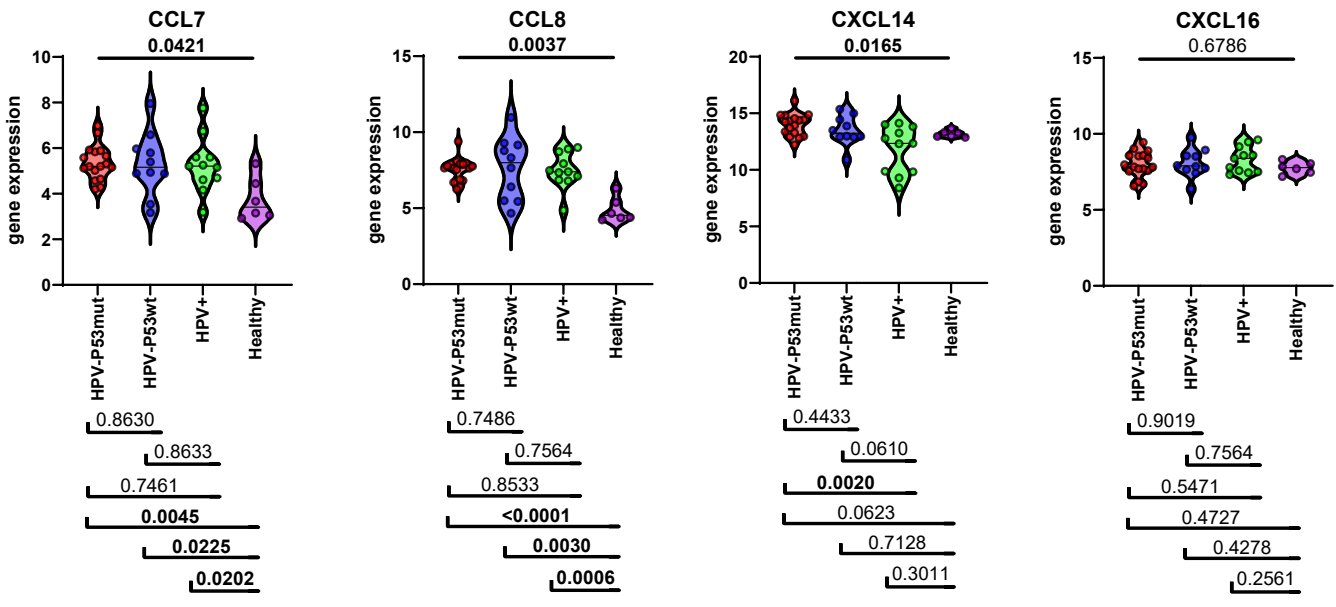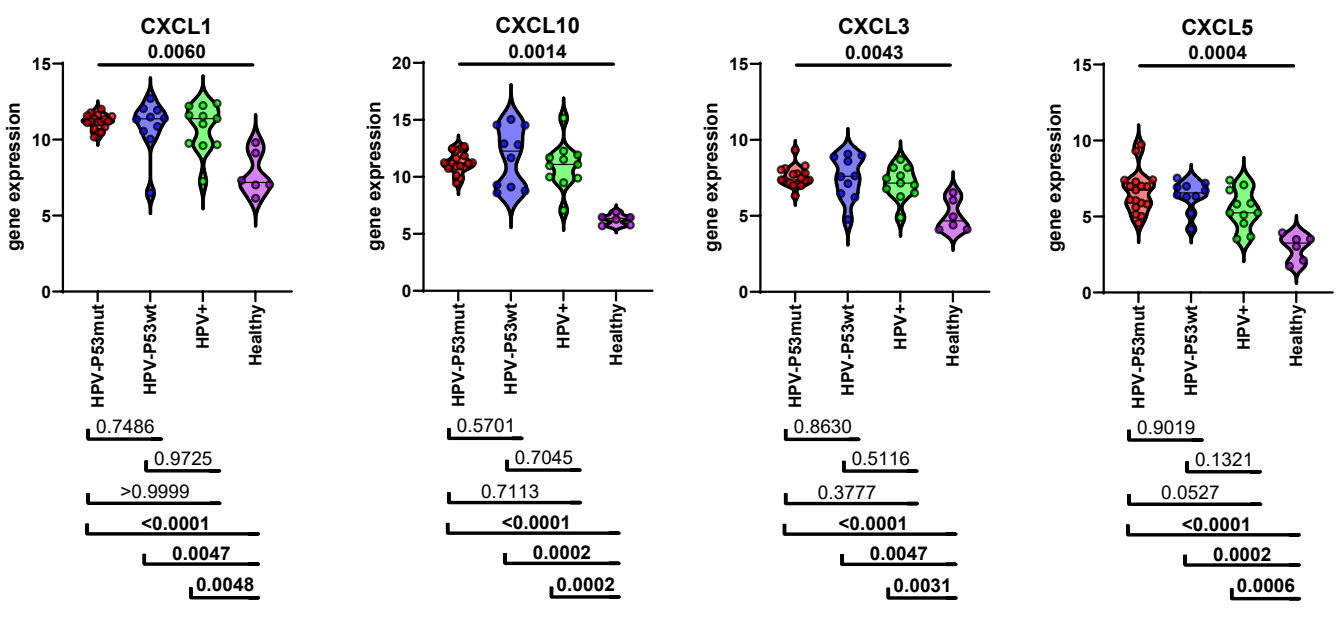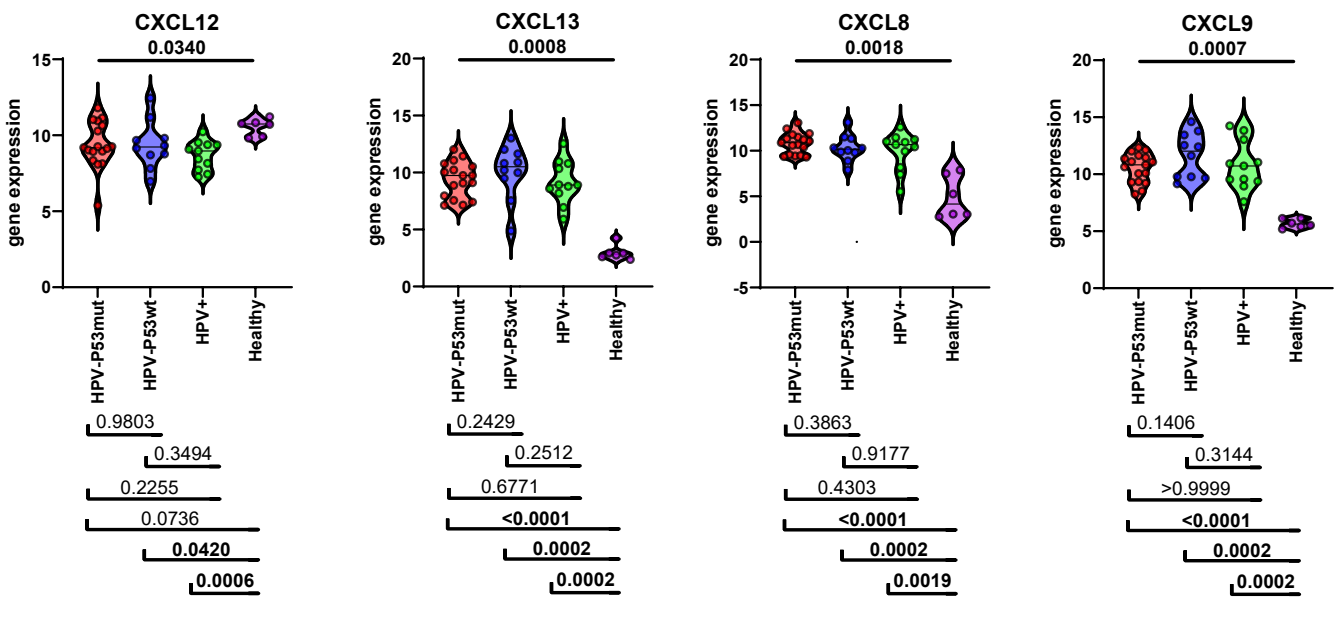



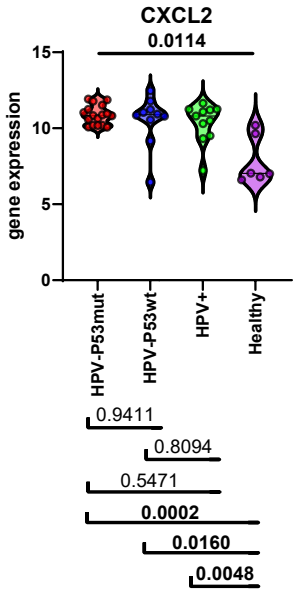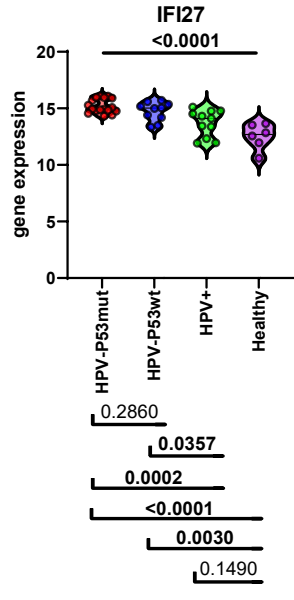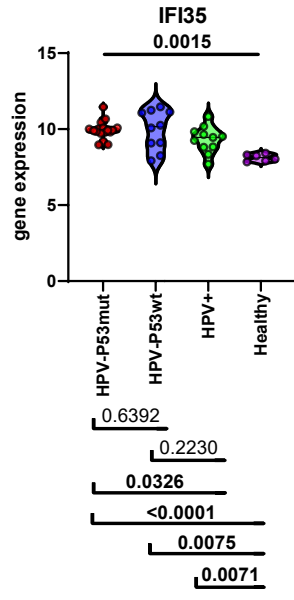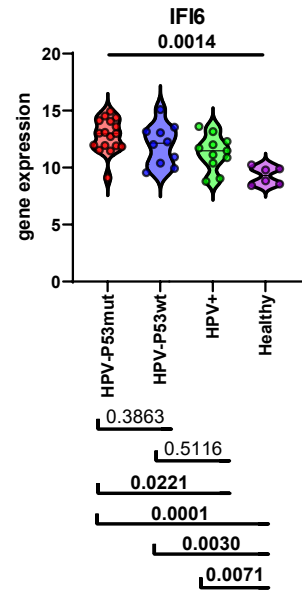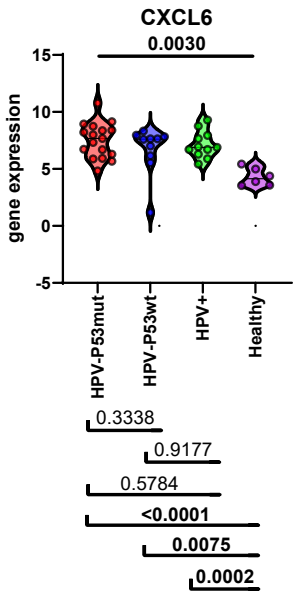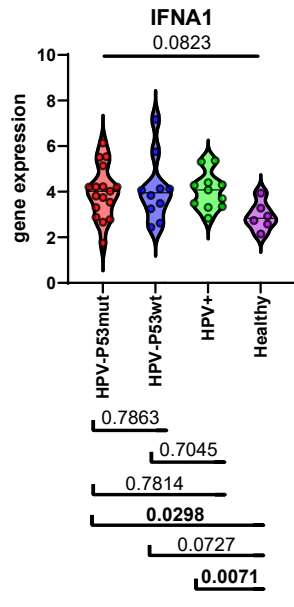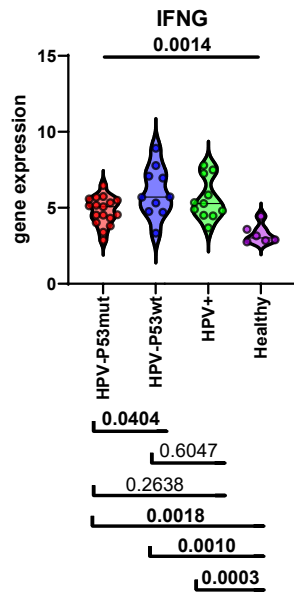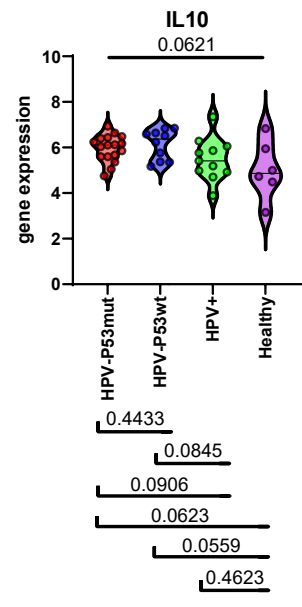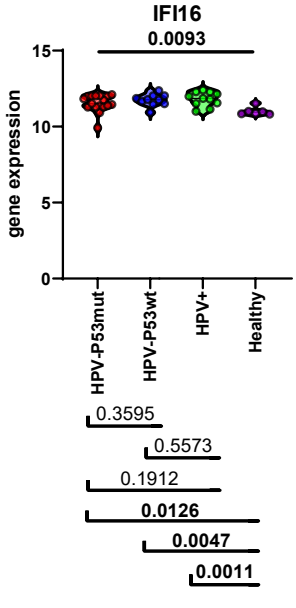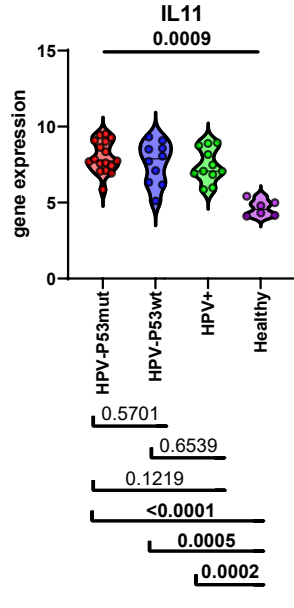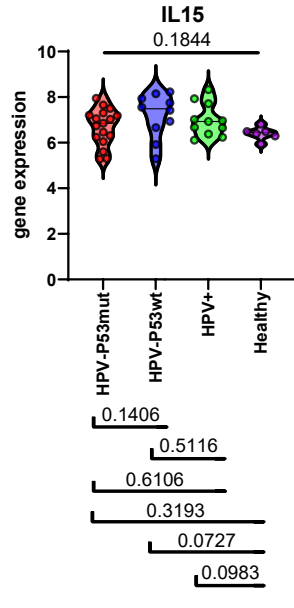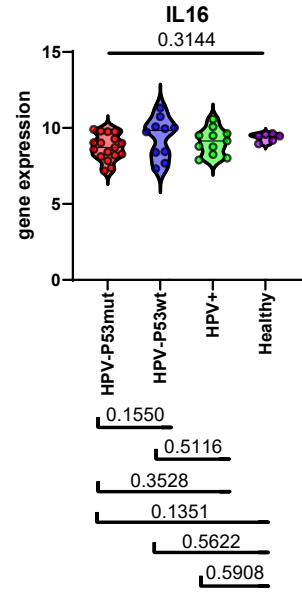

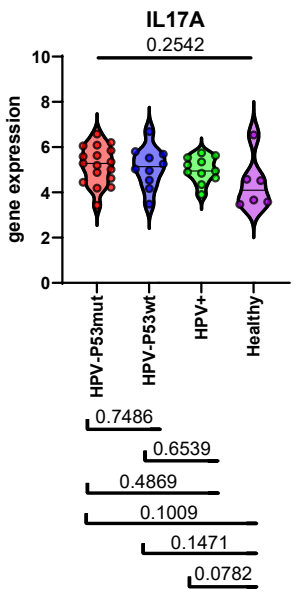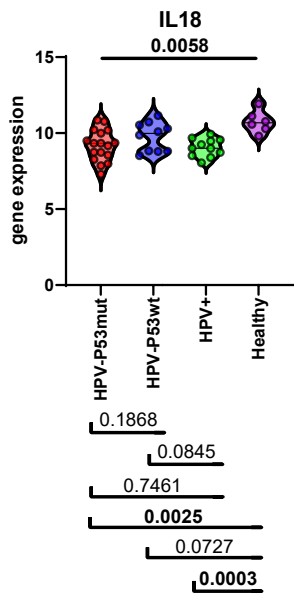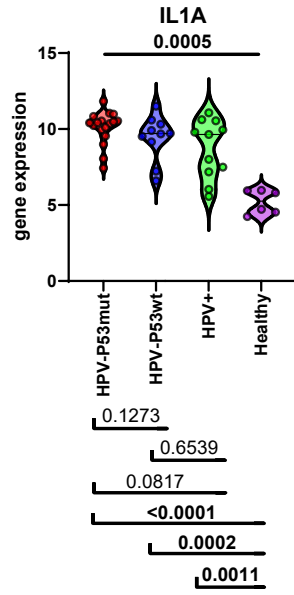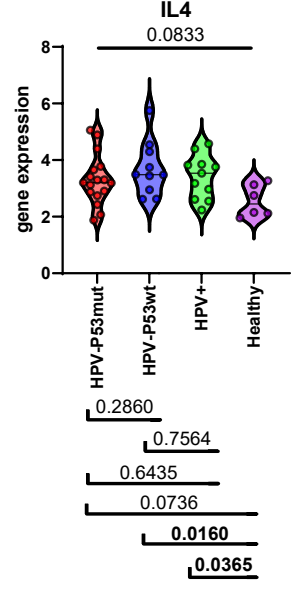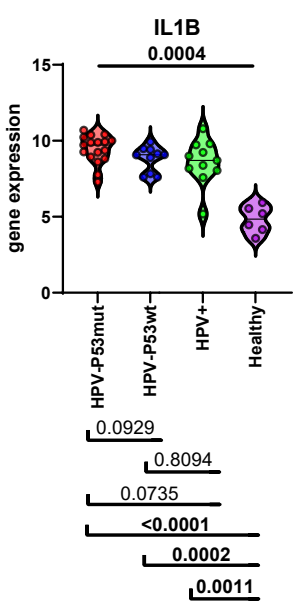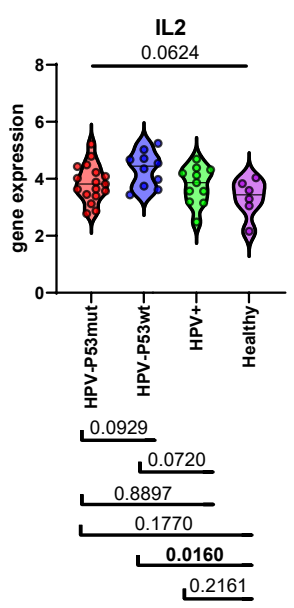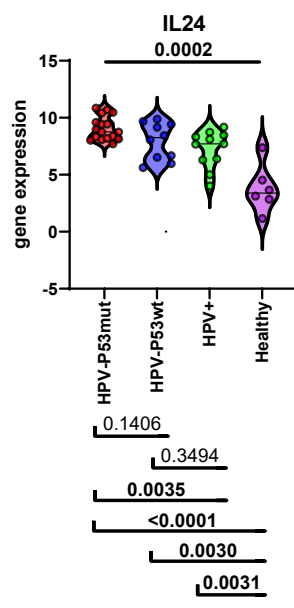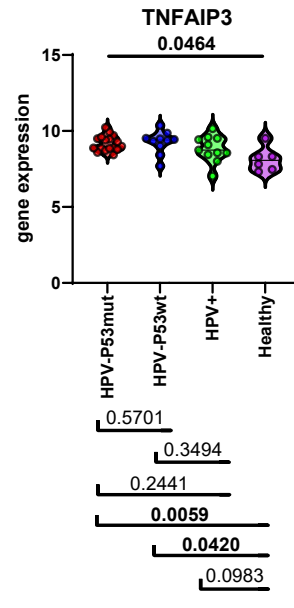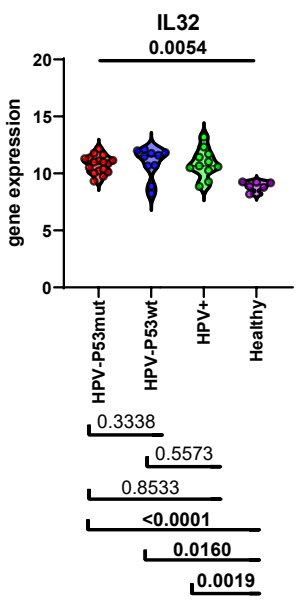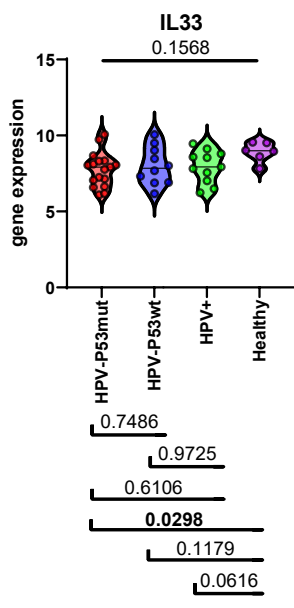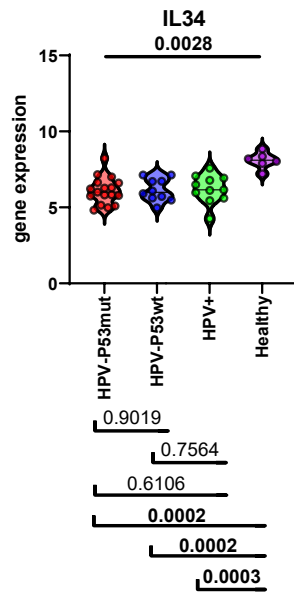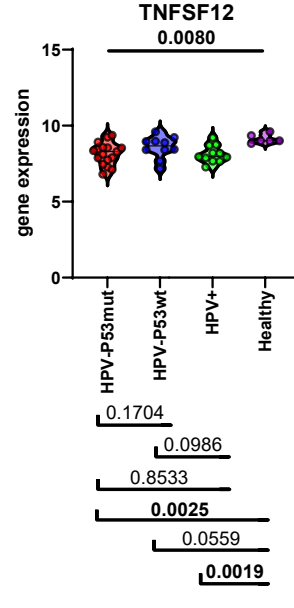

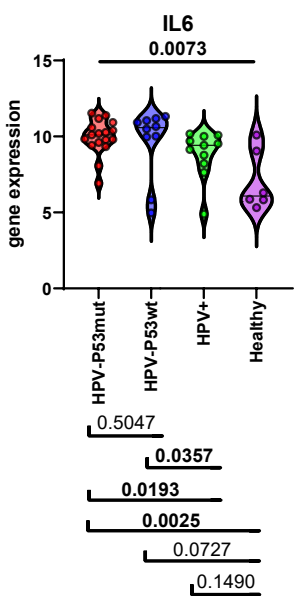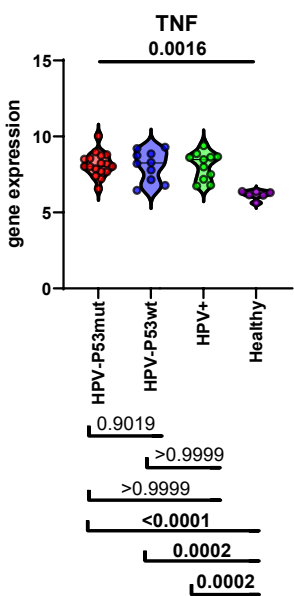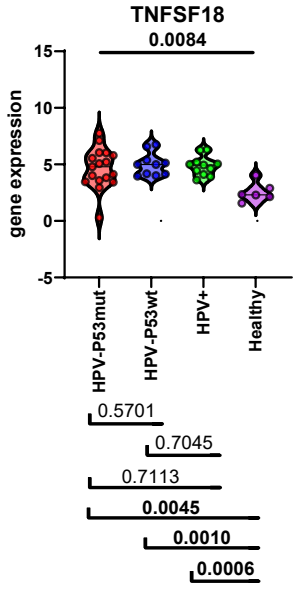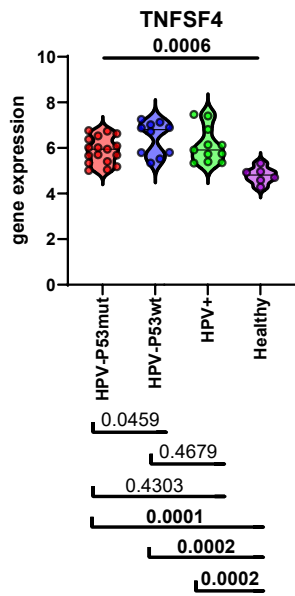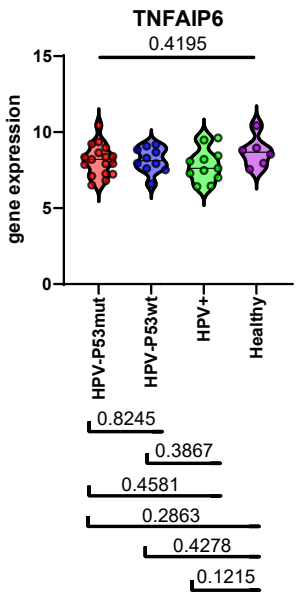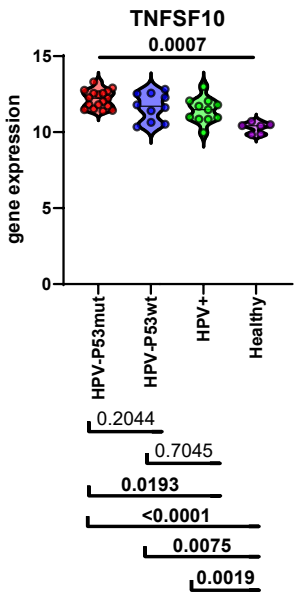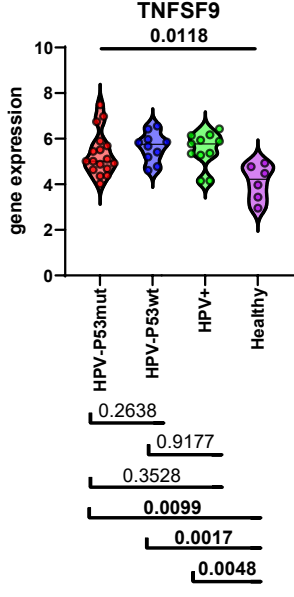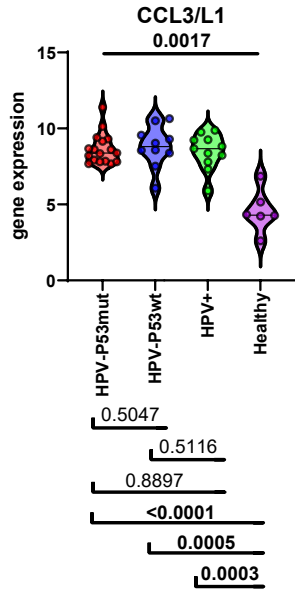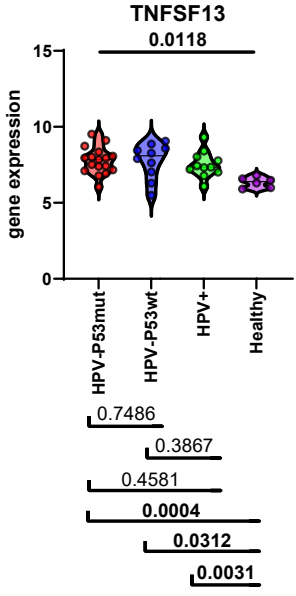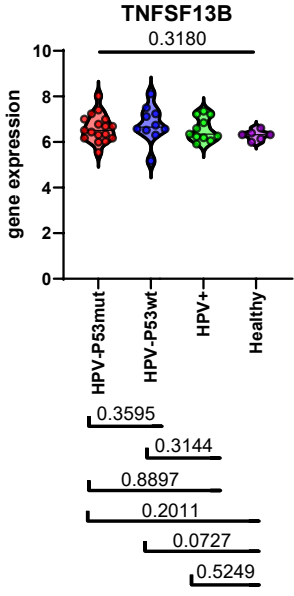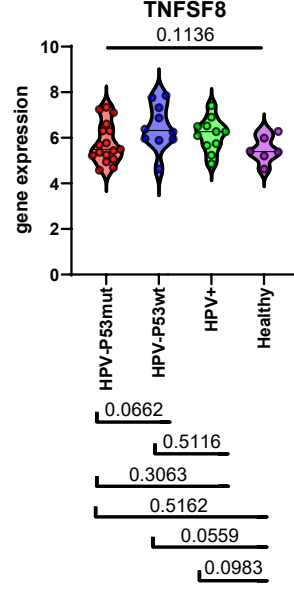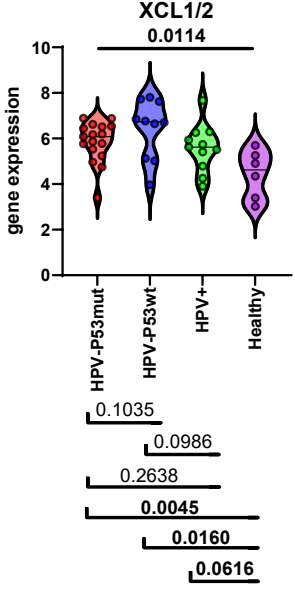

A

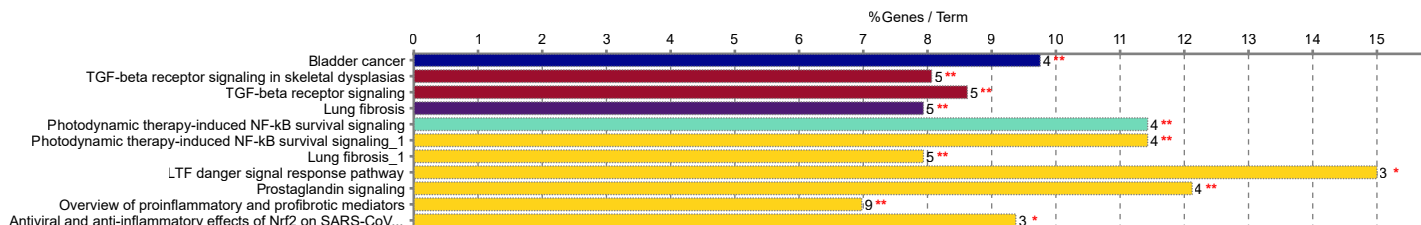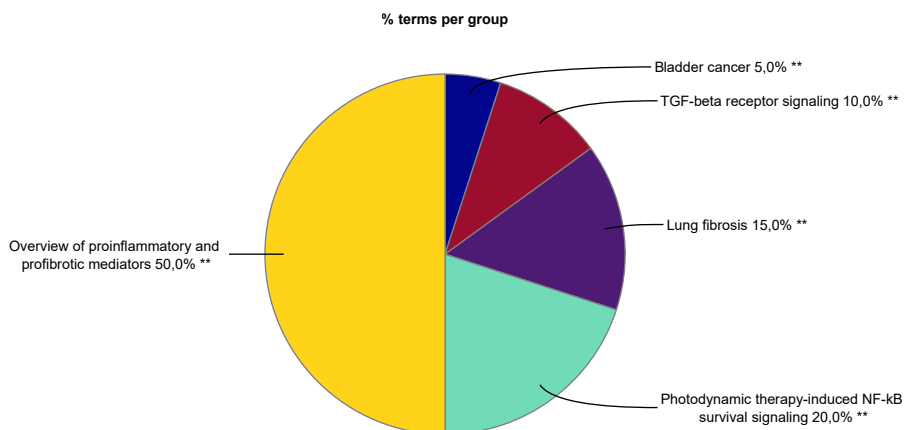

B

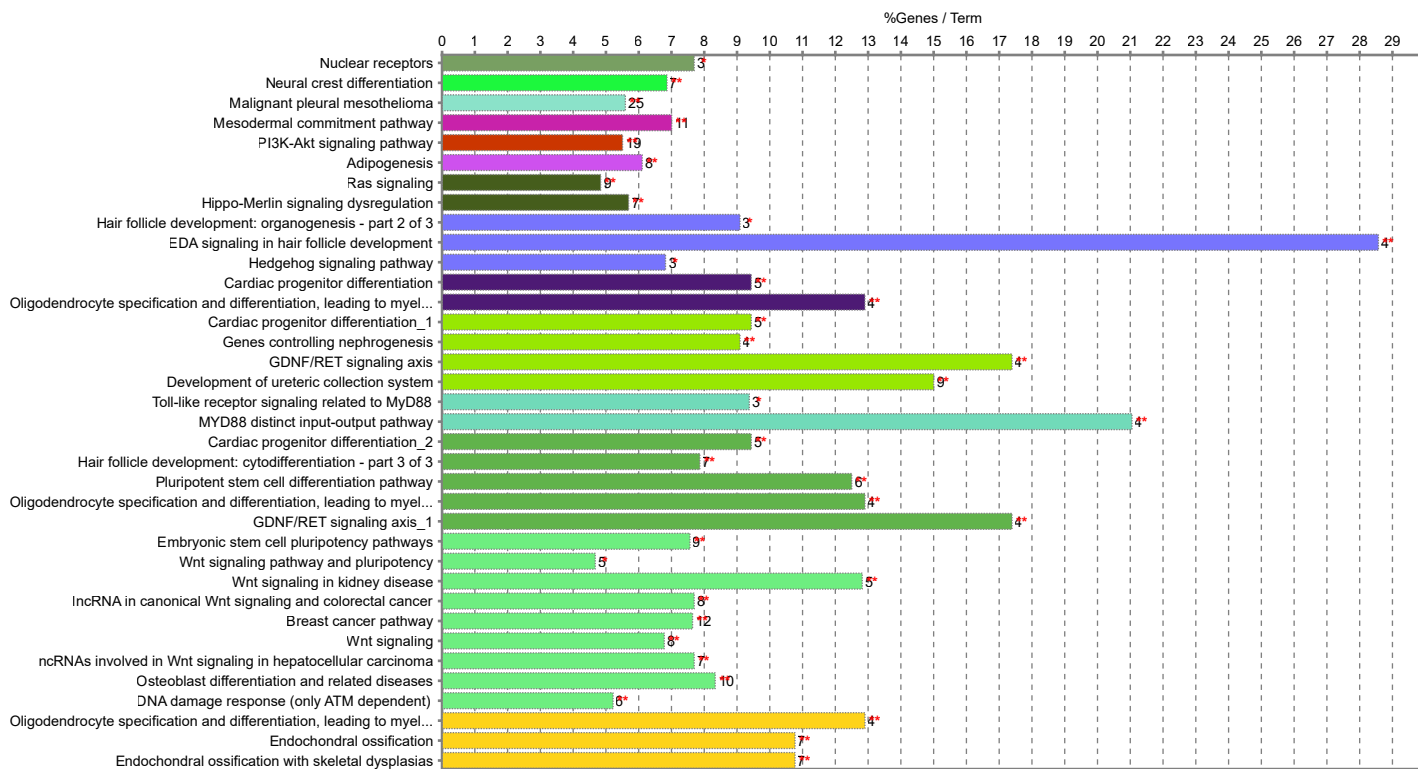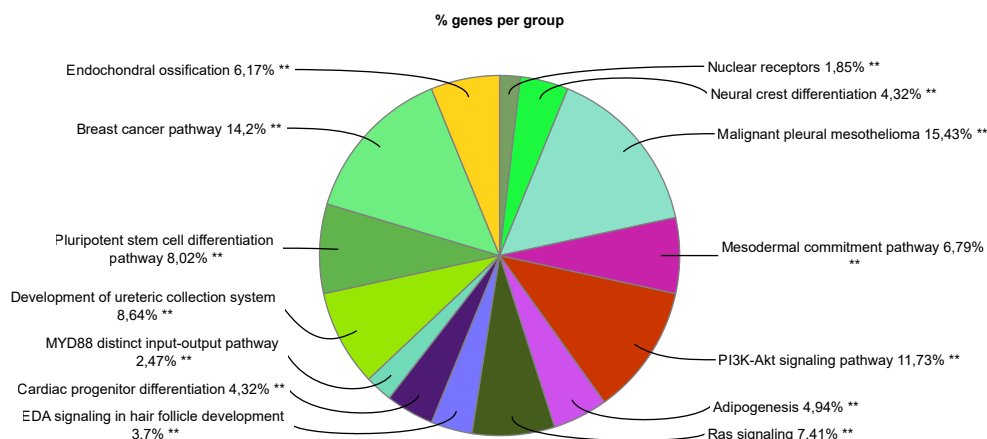

Supplemental Figure 7. Upregulated signaling pathways in monocyte hot and cold VSCC.

A) Epithelium monocyte hot (n=39) and in B) Epithelium monocyte cold (n=38) VSCC.

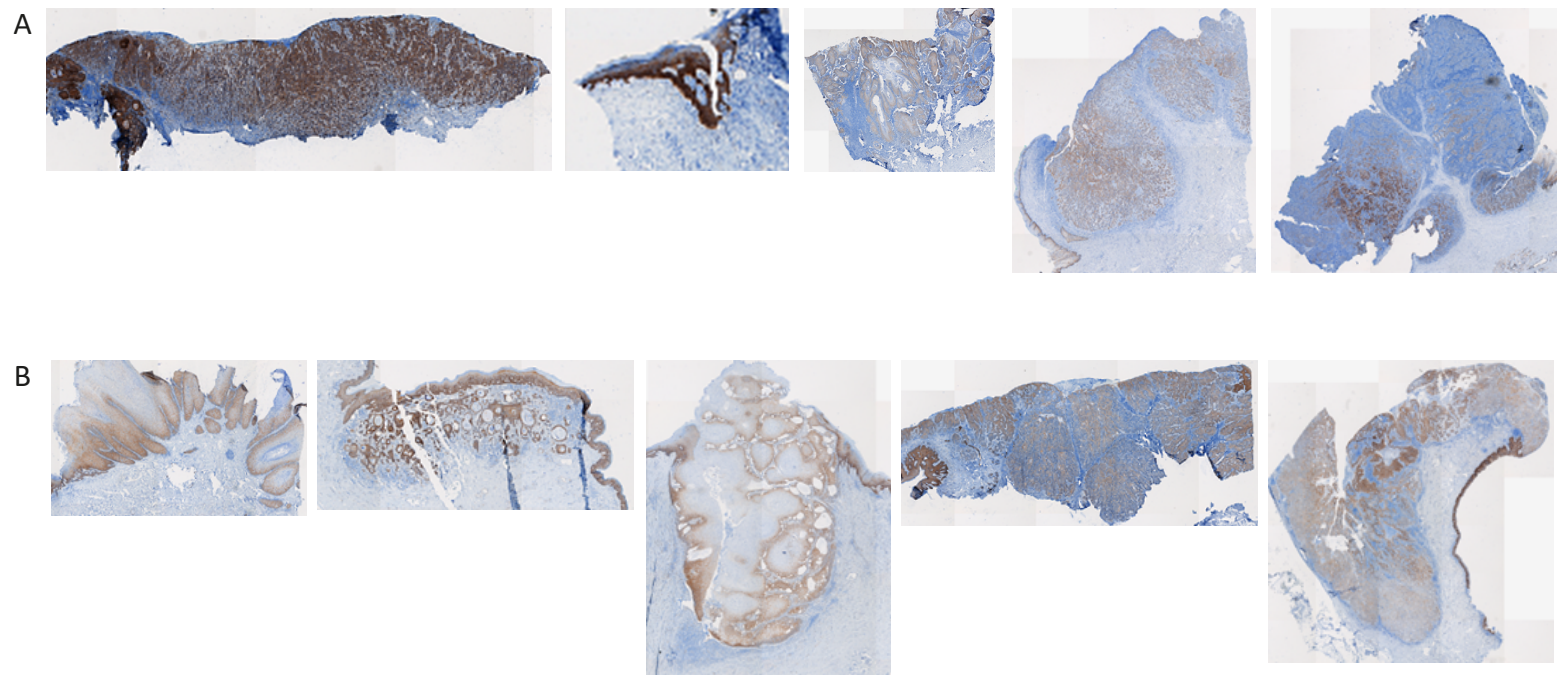

**Supplemental Figure 8. Beta-catenin immunohistochemistry on myeloid hot versus cold VSCC.**

10 representative cases of beta-catenin immunohistochemistry in A) epithelium myeloid hot (n=5) and B) epithelium myeloid cold (n=5) VSCC.

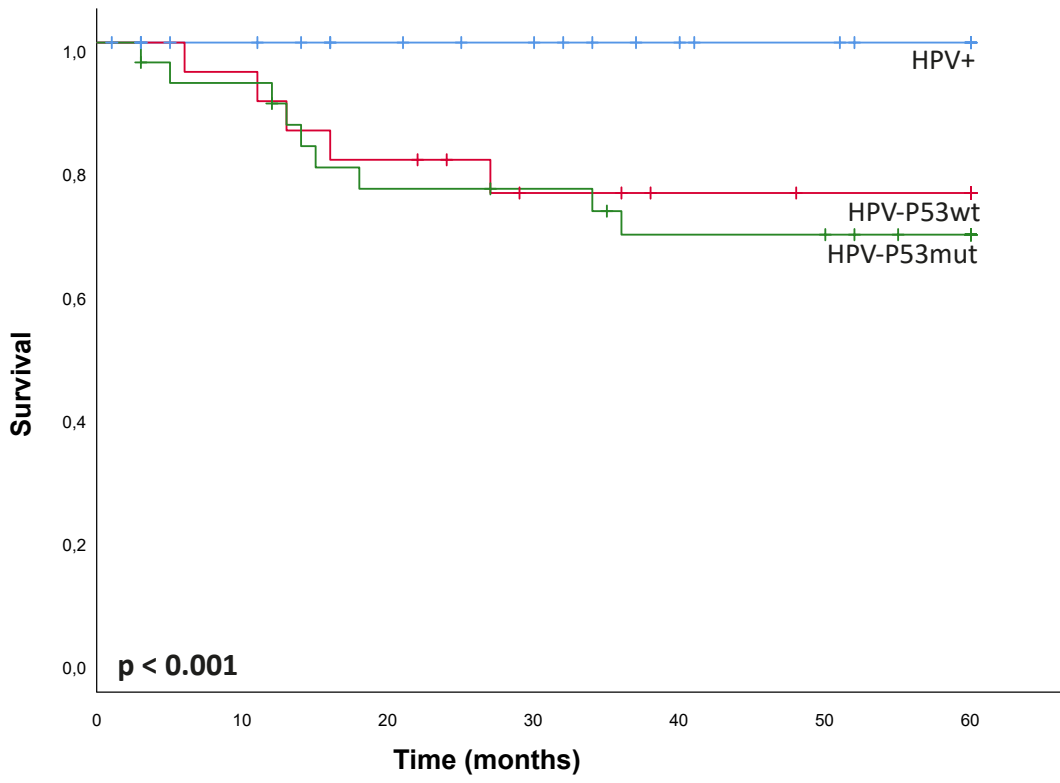

**Supplemental Figure 9. Kaplan Meier survival curves for VSCC, split per molecular subgroup.**  
VSCC total n=77. HPV-P53mut n=31, HPV-P53wt n=21, HPV+ n=25.
